# Supplementary material for: Interplay of pathogenic forms of human tau with different autophagic pathways
Source: PubMed Central journal article supplement (PMC5770880; doi:10.1111/acel.12692), 2017-10-12
Supplement: ACEL-17-na-s001.pdf [file ACEL-17-na-s001.pdf]

# **Interplay of Pathogenic Forms of Human Tau with Different Autophagic Pathways**

Benjamin Caballero<sup>1,2</sup> Yipeng Wang<sup>3,4</sup>, Antonio Diaz<sup>1,2</sup>, Inmaculada Tasset<sup>1,2</sup>, Yves Robert Juste<sup>1,2</sup>, Eva-Maria Mandelkow<sup>3,4</sup>, Eckhard Mandelkow<sup>3,4,\*</sup> and Ana Maria Cuervo<sup>1,2,\*</sup>

## **SUPPORTING INFORMATION**

**Supplementary Fig. 1. Proteolytic susceptibility of different mutant tau proteins.**

**Supplementary Fig. 2. Association of the CMA fluorescent reporter with lysosomes.**

**Supplementary Fig. 3. Resistance to stress of cells expressing disease-related mutant tau proteins.**

**Supplementary Fig. 4. Effect of disease-associated mutant tau proteins on macroautophagy flux.**

**Supplementary Fig. 5. Effect of disease-related mutant tau proteins on macroautophagy activation in response to stress.**

**Supplementary Fig. 6. Summary of the interplay of disease-related mutant tau proteins with different autophagic pathways.**

**Supplementary Fig. 7. Effect of different mutations and modifications on degradation of tau by CMA (left) or by e-MI**

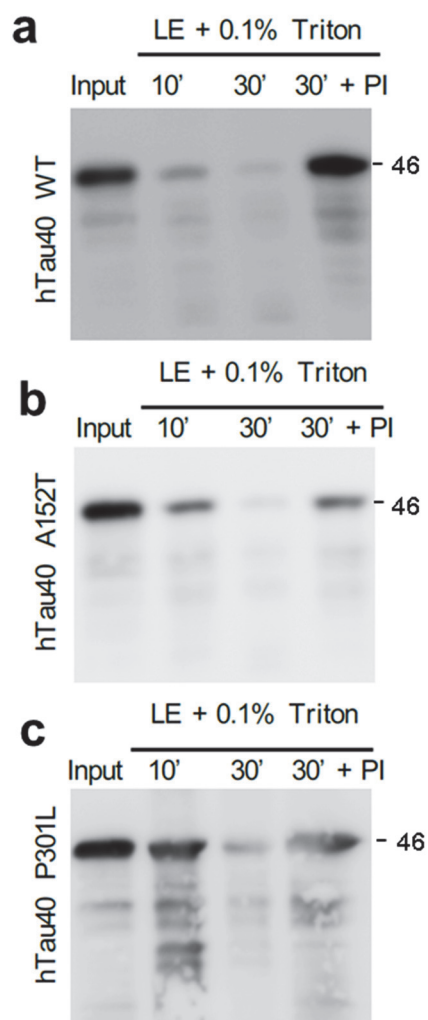

**Supplementary Fig. 1. Proteolytic susceptibility of different mutant tau proteins.** Immunoblots for tau of late endosomes (LE) pre-incubated with 0.1% Triton X-100 for 10 min on ice to disrupt the LE membrane and then incubated with 0.5  $\mu$ g of recombinant wild-type (WT) (**a**), A152T (**b**) or P301L (**c**) mutant tau (full-length, 2N4R) for the indicated times at 37°C. Input: 1/10 of tau added to the incubation. Where indicated, a cocktail of protease inhibitors (PI) was added into the incubation media.

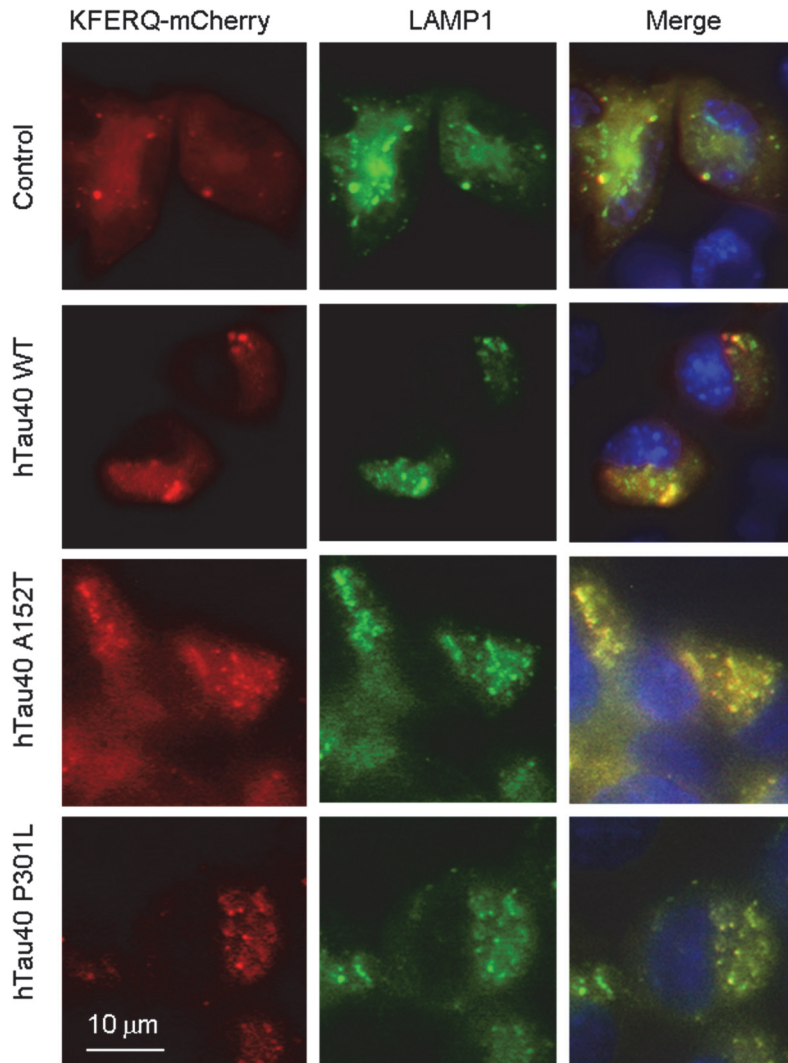

**Supplementary Fig. 2. Association of the CMA fluorescent reporter with lysosomes.**

Representative images of N2a cells expressing the indicated tau proteins and transduced with the lentivirus carrying the KFERQ-PA-mCherry reporter and immunostained with an antibody against LAMP-1 to highlight endo/lysosomal compartments. Note that in conditions with low CMA activity all KFERQ-PA-mCherry positive puncta is positive for LAMP-1, but that, as expected, not all LAMP1 positive compartments are positive for the CMA reporter since not all lysosomes are active for CMA. Nuclei were stained with DAPI.

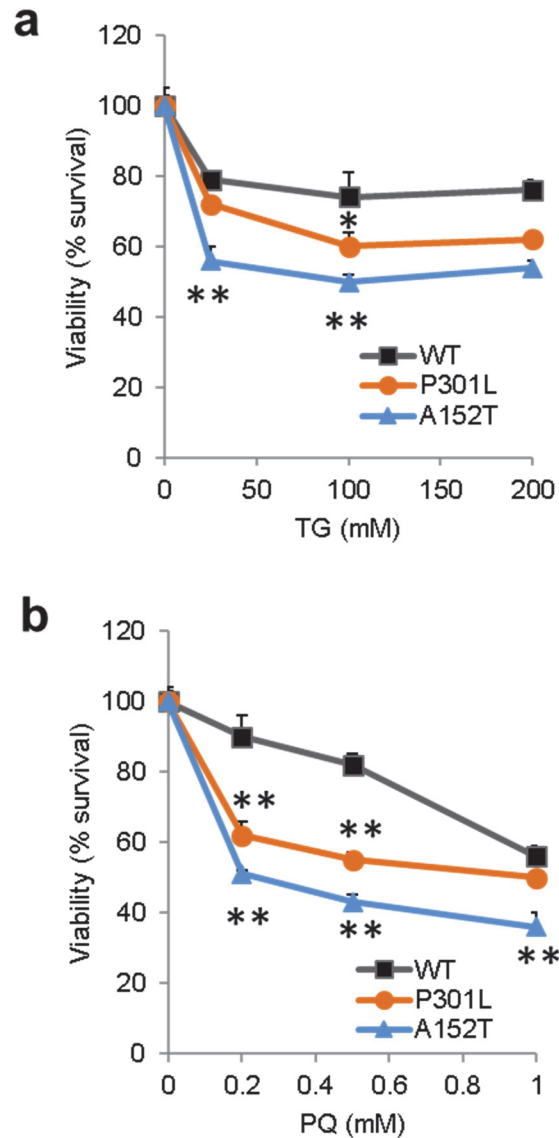

**Supplementary Fig. 3. Resistance to stress of cells expressing disease-related mutant tau proteins.** Mouse neuroblastoma cell lines Neuro-2a (N2a) treated with doxycycline to activate expression of the indicated tau proteins were incubated with the indicated concentrations of thapsigargin (TG) (**a**) or paraquat (PQ) (**b**) and cellular viability was measured after 12 h. Viability values were calculated as the percentage of cells alive relative to the number of cells in untreated wells. Values are mean $\pm$ s.e.m. of three independent wells per concentration. Differences with cells expressing WT tau were significant for \* $p$ <0.05 and \*\*  $p$ <0.01.

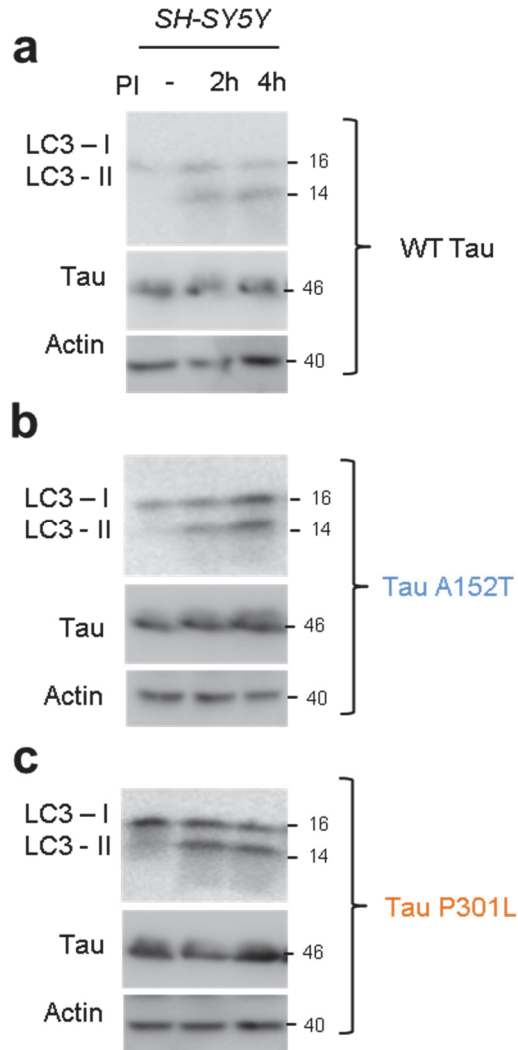

**Supplementary Fig. 4. Effect of disease-associated mutant tau proteins on macroautophagy flux.** Immunoblots for LC3 of neuroblastoma SH-SY5Y cells transiently transfected with plasmids expressing full length (2N4R) wild-type (WT) (a), A152T (b) or P301L (c) tau and incubated without (-) or with  $\text{NH}_4\text{Cl}$  20mM and leupeptin 200 $\mu\text{M}$  for 2 or 4 hours. Actin is shown as loading control and tau as a control for protein expression (note that the short times of incubation with the inhibitors does not allow for significant accumulation of tau proteins because they have a considerably longer half-life than LC3).

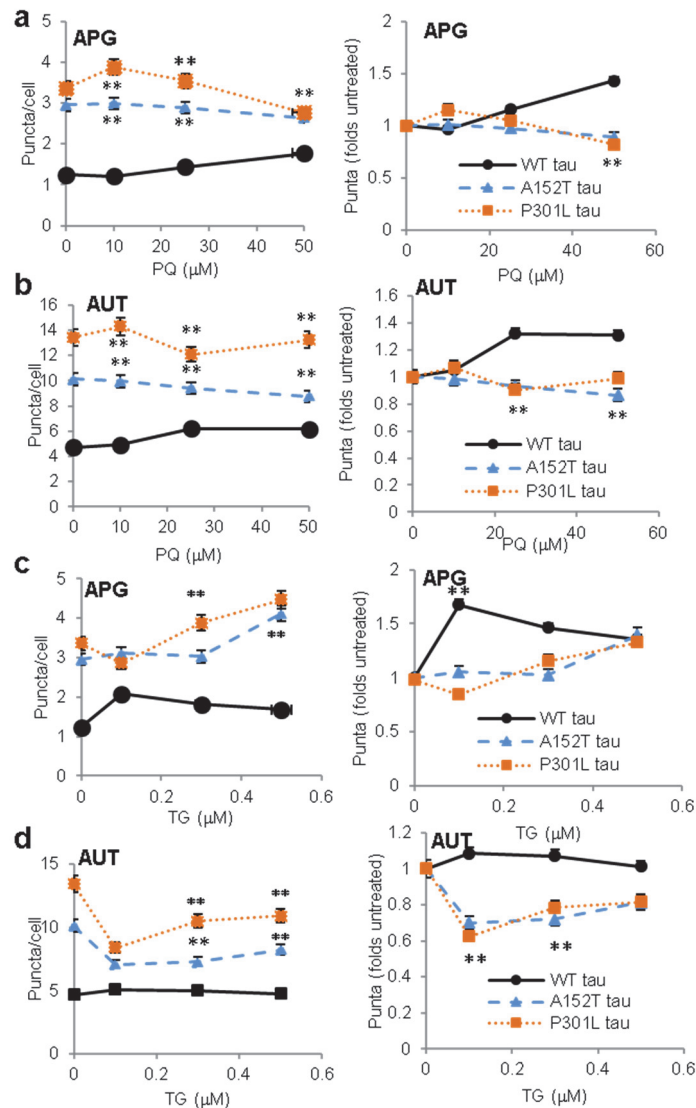

**Supplementary Figure 5. Effect of disease-related mutant tau proteins on macroautophagy activation in response to stress.** Mouse neuroblastoma cell lines Neuro-2a (N2a) treated with doxycycline to activate expression of the indicated full length (2N4R) tau proteins and transduced with the mCherry-GFP-LC3 reporter were maintained in presence of increasing concentrations of paraquat (PQ, **a,b**) or thapsigargin (TG, **c,d**). Quantification of total number (left) or number relative to untreated cells (right) of autophagosomes (APG, yellow puncta, **a,c**) and autolysosomes (AUT, red only puncta, **b,d**).  $n > 800$  cells/condition in three experiments with triplicate wells. All values are mean  $\pm$  s.e.m. Differences with cells expressing WT tau were significant for \* $p < 0.05$  and \*\* $p < 0.01$ .

**a** Tau degradation

|     | WT | A152T | P301L |
|-----|----|-------|-------|
| CMA | X  | X     | x     |
| eMI | x  |       |       |
| MA  |    | X     |       |

  

**b** Effect of Tau on Autophagy

|        | serum+ |       |       |
|--------|--------|-------|-------|
|        | WT     | A152T | P301L |
| CMA    |        |       | UP    |
| eMI    | down   | down  | down  |
| MA     |        | UP    | UP    |
| proteo |        | UP    |       |

  

|        | serum- |       |       |
|--------|--------|-------|-------|
|        | WT     | A152T | P301L |
| CMA    |        | UP    |       |
| MA     |        | UP    | UP    |
| proteo |        | UP    | UP    |

**Supplementary Figure 6. Summary of the interplay of disease-related mutant tau proteins with different autophagic pathways.** Schematic model summarizing the main differences on the degradation by autophagy (**a**) of the two different disease-related mutant tau proteins compared in this study and of their effect on basal (serum+) and inducible (serum-) activities of different autophagic pathways and proteasome (proteo) (**b**). The intensity of blue in **a** indicates rates of degradation. Grey: no degradation. In **b**, red indicates inhibition, green activation and grey no significant change.

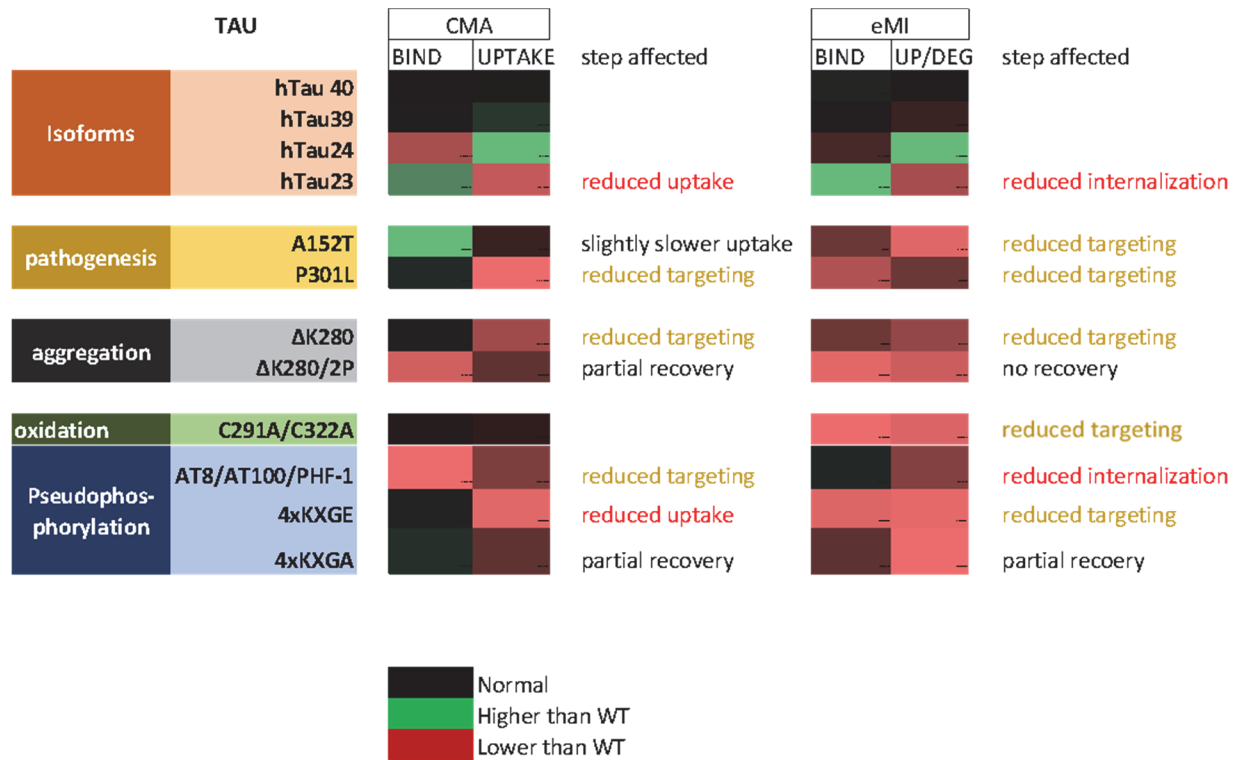

**Supplementary Figure 7. Effect of different mutations and modifications on degradation of tau by CMA (left) or by eMI (right).** Heatmap of the quantitative differences in binding (BIND) and uptake by CMA-active lysosomes (right) or binding or uptake plus degradation (UP/DEG) by late endosomes (right) of the indicated tau proteins relative to the values of hTau40 that was assigned an arbitrary value of 1. Values above 1 are in green and values below 1 in red. The affected CMA and eMI steps and the effect of proline replacement (in the case of ΔK280 tau) or replacement of E by A (in the pseudophosphorylation mutants) are indicated on the right.
